# Supplementary material for: Rainwater chemistry observation in a karst city: variations, influence factors, sources and potential environmental effects
Source: PeerJ journal article supplement (doi:10.7717/peerj.11167), 2021-04-20

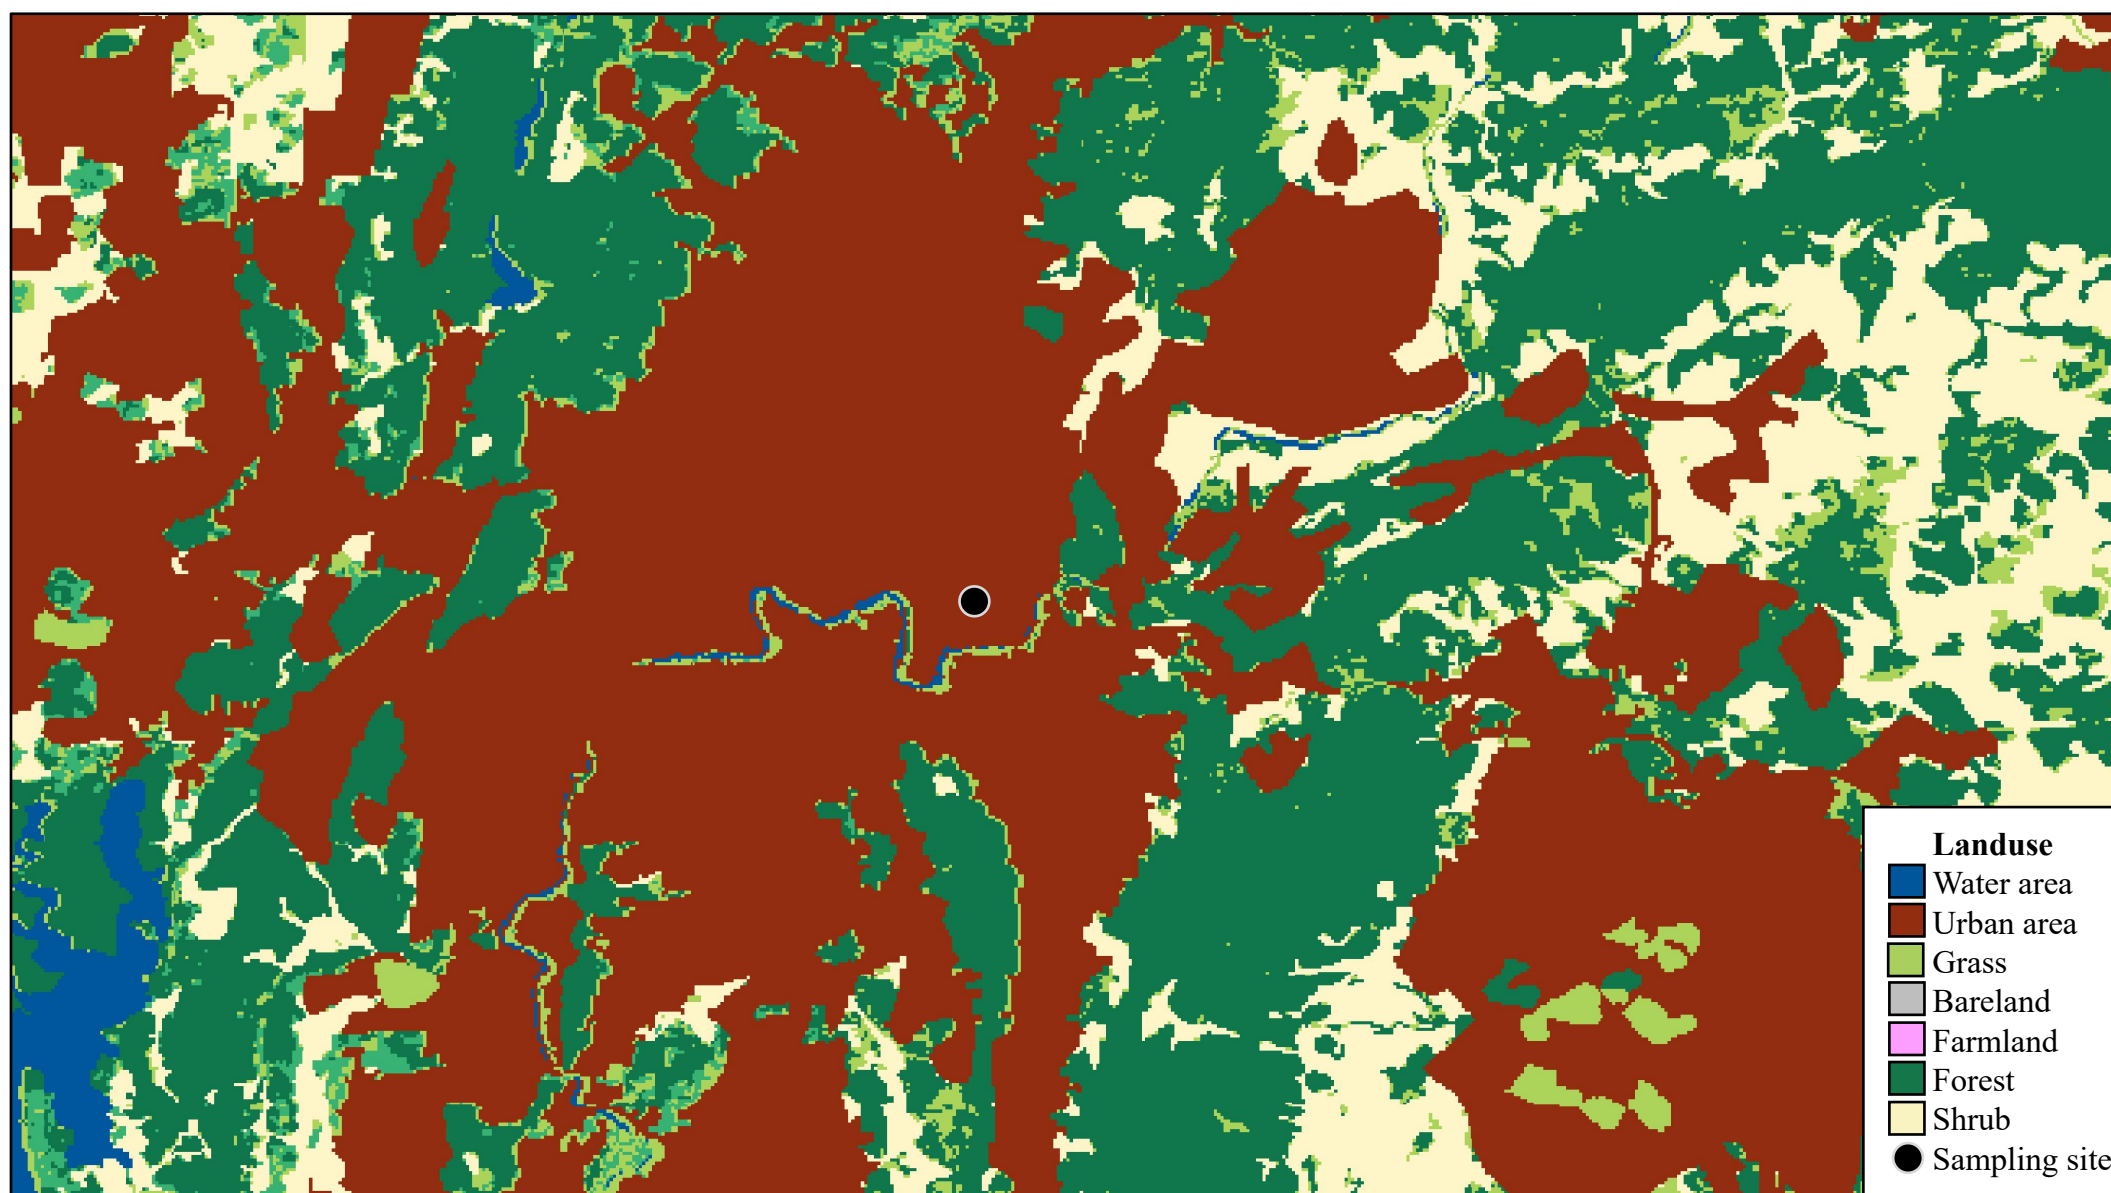

Supplement: Figure_S1.pdf [file Figure_S1.pdf]
