# Supplementary material for: Rainwater chemistry observation in a karst city: variations, influence factors, sources and potential environmental effects
Source: PeerJ journal article supplement (doi:10.7717/peerj.11167), 2021-04-20

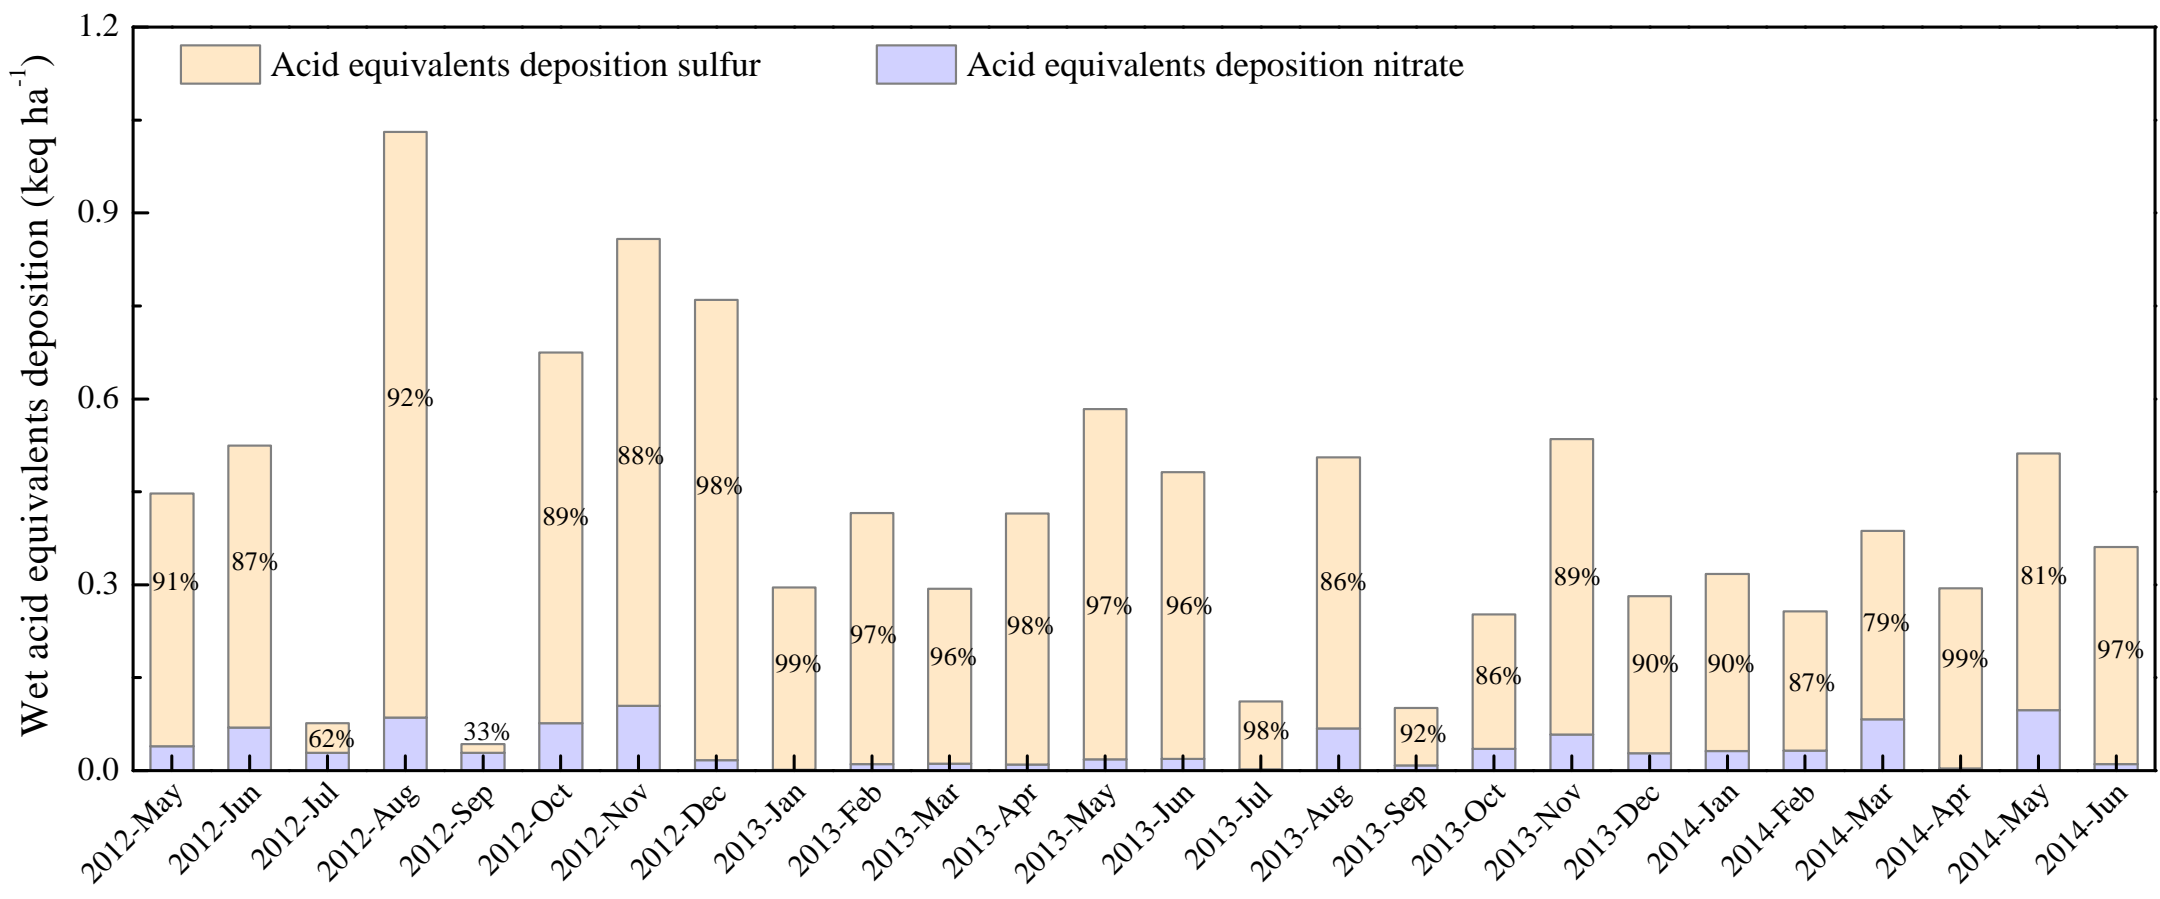

Supplement: Fiugre_S5.pdf [file Fiugre_S5.pdf]
