# Supplementary material for: Rainwater chemistry observation in a karst city: variations, influence factors, sources and potential environmental effects
Source: PeerJ. 2021 Apr 20;9:e11167. doi: 10.7717/peerj.11167 (PMC8065247; doi:10.7717/peerj.11167)
Supplement: Supplemental Information 6 [file peerj-09-11167-s006.xlsx]

## Sheet: Sheet1
Month	Rainfall amount	F-	Cl-	NO3-	SO42-	Na+	K+	Mg2+	Ca2+
	mm	μeq L-1	μeq L-1	μeq L-1	μeq L-1	μeq L-1	μeq L-1	μeq L-1	μeq L-1
2012-05-01	251.1	—	50.646	15.678	162.553	15.4806	8.61681	40.502	198.388
2012-06-01	211.9	—	239.588	32.7301	214.635	12.6968	7.93903	37.0047	166.066
2012-07-01	270	—	195.171	10.6816	17.7459	16.2549	6.49394	51.0265	231.553
2012-08-01	111	—	35.4133	77.3111	851.141	32.3184	10.9417	132.524	1615.79
2012-09-01	135.6	—	186.843	21.0922	10.5168	10.0957	7.08732	73.5684	443.425
2012-10-01	82.6	—	999.929	92.5392	724.694	30.1827	35.9174	221.551	1028.15
2012-11-01	35.6	51.5949	2905.66	293.794	2116.96	32.2053	40.7438	753.656	3718.83
2012-12-01	18	120.855	2122.76	92.5876	4127.16	36.5681	37.8434	127.269	2083.21
2013-01-01	11.4	112.422	1159.61	13.0492	2578.87	46.8595	52.6242	480.897	3695.22
2013-02-01	17.3	129.877	402.643	60.2493	2342	32.8143	98.6956	418.301	2897.79
2013-03-01	37.9	43.9836	216.654	28.8627	744.751	65.0761	74.7992	528.627	6652.44
2013-04-01	43.6	44.4257	171.142	22.2953	929.443	50.5568	22.7505	71.2314	1734.61
2013-05-01	224.2	18.2967	105.221	8.25753	252.153	5.71553	6.92363	94.0794	449.284
2013-06-01	191.7	24.6184	12.3554	9.89614	241.207	12.4837	3.02829	90.7089	585.174
2013-07-01	26.4	58.8694	26.3865	7.02535	415.62	18.0818	22.1623	168.347	1124.02
2013-08-01	123.7	7.73766	225.992	55.2739	353.256	10.2175	13.4841	78.4118	820.57
2013-09-01	81.6	2.72134	9.13117	10.459	113.85	19.1344	24.0703	139.012	939.588
2013-10-01	53.2	14.8858	188.68	65.4555	408.928	14.1714	13.8421	71.5935	624.168
2013-11-01	45.9	60.9222	678.465	126.226	1038.94	144.963	105.601	177.506	1726.9
2013-12-01	31.4	14.2173	451.85	88.3314	809.492	35.6894	16.676	166.265	1266.11
2014-01-01	16.6	50.0579	769.639	188.635	1721.65	44.4933	70.9755	226.311	2121.58
2014-02-01	37.7	15.9596	358.75	85.2106	595.54	14.9152	19.5969	139.818	644.493
2014-03-01	89.1	20.3864	116.79	92.915	341.174	24.1975	16.3435	111.84	577.424
2014-04-01	46.2	18.7072	249.489	7.20437	629.776	23.2579	38.0147	104.936	1248.15
2014-05-01	224.4	7.49553	121.907	43.5617	184.515	25.3893	10.7013	61.0936	286.077
2014-06-01	303.4	4.57417	7.15938	3.56912	115.287	5.30231	4.23807	17.942	124.512
Note: “—” denote undetected
